# Supplementary material for: Dietary Diversity and All-Cause and Cause-Specific Mortality in Japanese Community-Dwelling Older Adults
Source: PubMed Central journal article supplement (PMC7230563; doi:10.3390/nu12041052), 2020-04-10
Supplement: nutrients-12-01052-s001.pdf [file nutrients-12-01052-s001.pdf]

Supplementary Table 1. Multivariate-adjusted hazard ratios<sup>1</sup> for cancer mortality according to tertiles of each food intake

|                                    | Tertiles of each food intake |                  |                  | <i>p</i> |
|------------------------------------|------------------------------|------------------|------------------|----------|
|                                    | Lowest tertile               | Middle tertile   | Highest tertile  |          |
| <b>Cereal</b>                      |                              |                  |                  |          |
| Median (g/day)                     | 350.0                        | 441.8            | 603.3            |          |
| Number of each tertile             | 264                          | 268              | 267              |          |
| Death n, %                         | 29, 10.9%                    | 28, 10.4%        | 35, 13.1%        |          |
| HR (95% CI)                        | 1 (ref)                      | 1.01 (0.57-1.79) | 1.07 (0.61-1.90) | 0.961    |
| <b>Potatoes</b>                    |                              |                  |                  |          |
| Median (g/day)                     | 15.7                         | 43.8             | 86.7             |          |
| Number of each tertile             | 261                          | 271              | 267              |          |
| Death n, %                         | 37, 14.1%                    | 30, 11.0%        | 25, 9.3%         |          |
| HR (95% CI)                        | 1 (ref)                      | 0.77 (0.46-1.28) | 0.62 (0.35-1.06) | 0.215    |
| <b>Beans</b>                       |                              |                  |                  |          |
| Median (g/day)                     | 25.8                         | 61.7             | 117              |          |
| Number of each tertile             | 264                          | 264              | 271              |          |
| Death n, %                         | 31, 11.7%                    | 35, 13.2%        | 26, 9.5%         |          |
| HR (95% CI)                        | 1 (ref)                      | 1.09 (0.65-1.84) | 0.64 (0.37-1.12) | 0.124    |
| <b>Nuts and seeds</b>              |                              |                  |                  |          |
| Median (g/day)                     | 0.0                          | 1.3              | 7.3              |          |
| Number of each tertile             | 265                          | 256              | 278              |          |
| Death n, %                         | 38, 14.3%                    | 31, 12.1%        | 23, 8.2%         |          |
| HR (95% CI)                        | 1 (ref)                      | 0.87 (0.52-1.45) | 0.58 (0.33-1.00) | 0.145    |
| <b>Non-green yellow vegetables</b> |                              |                  |                  |          |
| Median (g/day)                     | 99.8                         | 172.7            | 259.1            |          |
| Number of each tertile             | 265                          | 267              | 267              |          |
| Death n, %                         | 36, 13.5%                    | 23, 8.6%         | 33, 12.3%        |          |
| HR (95% CI)                        | 1 (ref)                      | 0.66 (0.37-1.14) | 1.13 (0.64-1.97) | 0.156    |
| <b>Green yellow vegetables</b>     |                              |                  |                  |          |
| Median (g/day)                     | 57.0                         | 114.4            | 187.6            |          |
| Number of each tertile             | 265                          | 267              | 267              |          |
| Death n, %                         | 31, 11.7%                    | 29, 10.8%        | 32, 11.9%        |          |
| HR (95% CI)                        | 1 (ref)                      | 1.08 (0.61-1.93) | 1.38 (0.78-2.48) | 0.510    |
| <b>Fruits</b>                      |                              |                  |                  |          |
| Median (g/day)                     | 61.0                         | 148.5            | 276.7            |          |
| Number of each tertile             | 262                          | 270              | 267              |          |
| Death n, %                         | 39, 14.8%                    | 30, 11.1%        | 23, 8.6%         |          |
| HR (95% CI)                        | 1 (ref)                      | 0.87 (0.51-1.47) | 0.70 (0.39-1.23) | 0.470    |
| <b>Mushrooms</b>                   |                              |                  |                  |          |
| Median (g/day)                     | 0.0                          | 10               | 27.6             |          |
| Number of each tertile             | 259                          | 271              | 269              |          |
| Death n, %                         | 33, 12.7%                    | 31, 11.4%        | 28, 10.4%        |          |
| HR (95% CI)                        | 1 (ref)                      | 0.90 (0.53-1.54) | 0.82 (0.47-1.41) | 0.773    |
| <b>Seaweed</b>                     |                              |                  |                  |          |
| Median (g/day)                     | 3.4                          | 11.3             | 27.5             |          |
| Number of each tertile             | 265                          | 267              | 267              |          |
| Death n, %                         | 33, 12.4%                    | 22, 8.2%         | 37, 13.8%        |          |
| HR (95% CI)                        | 1 (ref)                      | 0.65 (0.36-1.15) | 1.02 (0.61-1.72) | 0.222    |
| <b>Fish and shellfish</b>          |                              |                  |                  |          |
| Median (g/day)                     | 54.1                         | 89.5             | 143.3            |          |
| Number of each tertile             | 265                          | 267              | 267              |          |
| Death n, %                         | 27, 10.1%                    | 26, 9.7%         | 39, 14.6%        |          |
| HR (95% CI)                        | 1 (ref)                      | 0.99 (0.56-1.75) | 1.32 (0.77-2.28) | 0.481    |
| <b>Meats</b>                       |                              |                  |                  |          |
| Median (g/day)                     | 21.7                         | 48.3             | 80               |          |
| Number of each tertile             | 265                          | 266              | 268              |          |
| Death n, %                         | 34, 12.8%                    | 31, 11.6%        | 27, 10.0%        |          |
| HR (95% CI)                        | 1 (ref)                      | 1.08 (0.64-1.84) | 0.80 (0.45-1.39) | 0.538    |
| <b>Eggs</b>                        |                              |                  |                  |          |
| Median (g/day)                     | 20.0                         | 45               | 68.8             |          |
| Number of each tertile             | 264                          | 267              | 268              |          |
| Death n, %                         | 30, 11.3%                    | 33, 12.3%        | 29, 10.8%        |          |
| HR (95% CI)                        | 1 (ref)                      | 1.13 (0.68-1.90) | 0.82 (0.47-1.42) | 0.504    |
| <b>Milk and dairy products</b>     |                              |                  |                  |          |
| Median (g/day)                     | 13.3                         | 155.7            | 285.3            |          |
| Number of each tertile             | 262                          | 270              | 267              |          |
| Death n, %                         | 31, 11.8%                    | 30, 11.1%        | 31, 11.6%        |          |
| HR (95% CI)                        | 1 (ref)                      | 0.87 (0.50-1.49) | 1.18 (0.67-2.08) | 0.542    |

HR—Hazard ratio, CI—Confidence Interval, ref—reference.

<sup>1</sup> HR adjusted for age, sex, body mass index, education, smoking status, alcohol intake, physical activity and history of hypertension, dyslipidemia, and diabetes mellitus. All food intakes were entered in a single model.

Supplementary Table 2. Multivariate-adjusted hazard ratios<sup>1</sup> for cardiovascular mortality according to tertiles of each food intake

|                                    | Tertiles of each food intake |                  |                  | <i>p</i> |
|------------------------------------|------------------------------|------------------|------------------|----------|
|                                    | Lowest tertile               | Middle tertile   | Highest tertile  |          |
| <b>Cereal</b>                      |                              |                  |                  |          |
| Median (g/day)                     | 350.0                        | 441.8            | 603.3            |          |
| Number of each tertile             | 264                          | 268              | 267              |          |
| Death n, %                         | 14, 5.3%                     | 10, 3.7%         | 14, 5.2%         |          |
| HR (95% CI)                        | 1 (ref)                      | 0.71 (0.26-1.82) | 1.09 (0.46-2.60) | 0.621    |
| <b>Potatoes</b>                    |                              |                  |                  |          |
| Median (g/day)                     | 15.7                         | 43.8             | 86.7             |          |
| Number of each tertile             | 261                          | 271              | 267              |          |
| Death n, %                         | 9, 3.4%                      | 18, 6.6%         | 11, 4.1%         |          |
| HR (95% CI)                        | 1 (ref)                      | 1.65 (0.70-4.13) | 0.91 (0.33-2.50) | 0.294    |
| <b>Beans</b>                       |                              |                  |                  |          |
| Median (g/day)                     | 25.8                         | 61.7             | 117              |          |
| Number of each tertile             | 264                          | 264              | 271              |          |
| Death n, %                         | 12, 4.5%                     | 9, 3.4%          | 17, 6.2%         |          |
| HR (95% CI)                        | 1 (ref)                      | 0.65 (0.25-1.64) | 1.39 (0.60-3.29) | 0.253    |
| <b>Nuts and seeds</b>              |                              |                  |                  |          |
| Median (g/day)                     | 0.0                          | 1.3              | 7.3              |          |
| Number of each tertile             | 265                          | 256              | 278              |          |
| Death n, %                         | 14, 5.2%                     | 10, 3.9%         | 14, 5%           |          |
| HR (95% CI)                        | 1 (ref)                      | 0.99 (0.40-2.38) | 1.46 (0.63-3.41) | 0.589    |
| <b>Non-green yellow vegetables</b> |                              |                  |                  |          |
| Median (g/day)                     | 99.8                         | 172.7            | 259.1            |          |
| Number of each tertile             | 265                          | 267              | 267              |          |
| Death n, %                         | 18, 6.7%                     | 12, 4.4%         | 8, 3%            |          |
| HR (95% CI)                        | 1 (ref)                      | 0.85 (0.36-1.94) | 0.40 (0.14-1.06) | 0.191    |
| <b>Green yellow vegetables</b>     |                              |                  |                  |          |
| Median (g/day)                     | 57.0                         | 114.4            | 187.6            |          |
| Number of each tertile             | 265                          | 267              | 267              |          |
| Death n, %                         | 14, 5.2%                     | 12, 4.4%         | 12, 4.4%         |          |
| HR (95% CI)                        | 1 (ref)                      | 0.78 (0.32-1.86) | 1.02 (0.40-2.55) | 0.800    |
| <b>Fruits</b>                      |                              |                  |                  |          |
| Median (g/day)                     | 61.0                         | 148.5            | 276.7            |          |
| Number of each tertile             | 262                          | 270              | 267              |          |
| Death n, %                         | 10, 3.8%                     | 11, 4%           | 17, 6.3%         |          |
| HR (95% CI)                        | 1 (ref)                      | 1.29 (0.50-3.41) | 2.16 (0.92-5.36) | 0.191    |
| <b>Mushrooms</b>                   |                              |                  |                  |          |
| Median (g/day)                     | 0.0                          | 10               | 27.6             |          |
| Number of each tertile             | 259                          | 271              | 269              |          |
| Death n, %                         | 19, 7.3%                     | 7, 2.5%          | 12, 4.4%         |          |
| HR (95% CI)                        | 1 (ref)                      | 0.45 (0.17-1.12) | 0.81 (0.36-1.76) | 0.254    |
| <b>Seaweed</b>                     |                              |                  |                  |          |
| Median (g/day)                     | 3.4                          | 11.3             | 27.5             |          |
| Number of each tertile             | 265                          | 267              | 267              |          |
| Death n, %                         | 14, 5.2%                     | 16, 5.9%         | 8, 3%            |          |
| HR (95% CI)                        | 1 (ref)                      | 1.15 (0.51-2.61) | 0.64 (0.24-1.60) | 0.452    |
| <b>Fish and shellfish</b>          |                              |                  |                  |          |
| Median (g/day)                     | 54.1                         | 89.5             | 143.3            |          |
| Number of each tertile             | 265                          | 267              | 267              |          |
| Death n, %                         | 17, 6.4%                     | 12, 4.4%         | 9, 3.3%          |          |
| HR (95% CI)                        | 1 (ref)                      | 1.17 (0.50-2.74) | 0.74 (0.29-1.76) | 0.620    |
| <b>Meats</b>                       |                              |                  |                  |          |
| Median (g/day)                     | 21.7                         | 48.3             | 80               |          |
| Number of each tertile             | 265                          | 266              | 268              |          |
| Death n, %                         | 12, 4.5%                     | 12, 4.5%         | 14, 5.2%         |          |
| HR (95% CI)                        | 1 (ref)                      | 1.07 (0.43-2.69) | 1.71 (0.71-4.17) | 0.416    |
| <b>Eggs</b>                        |                              |                  |                  |          |
| Median (g/day)                     | 20.0                         | 45               | 68.8             |          |
| Number of each tertile             | 264                          | 267              | 268              |          |
| Death n, %                         | 11, 4.1%                     | 14, 5.2%         | 13, 4.8%         |          |
| HR (95% CI)                        | 1 (ref)                      | 1.02 (0.41-2.52) | 1.48 (0.62-3.62) | 0.599    |
| <b>Milk and dairy products</b>     |                              |                  |                  |          |
| Median (g/day)                     | 13.3                         | 155.7            | 285.3            |          |
| Number of each tertile             | 262                          | 270              | 267              |          |
| Death n, %                         | 15, 5.7%                     | 11, 4.0%         | 12, 4.4%         |          |
| HR (95% CI)                        | 1 (ref)                      | 0.64 (0.26-1.53) | 0.52 (0.20-1.30) | 0.359    |

HR—Hazard ratio, CI—Confidence Interval, ref—reference.

<sup>1</sup> HR adjusted for age, sex, body mass index, education, smoking status, alcohol intake, physical activity and history of hypertension, dyslipidemia, and diabetes mellitus. All food intakes were entered in a single model.

Supplementary Table 3. Multivariate-adjusted hazard ratios<sup>1</sup> for cerebrovascular mortality according to tertiles of each food intake

|                                    | Tertiles of each food intake |                  |                  | <i>p</i> |
|------------------------------------|------------------------------|------------------|------------------|----------|
|                                    | Lowest tertile               | Middle tertile   | Highest tertile  |          |
| <b>Cereal</b>                      |                              |                  |                  |          |
| Median (g/day)                     | 350.0                        | 441.8            | 603.3            |          |
| Number of each tertile             | 264                          | 268              | 267              |          |
| Death n, %                         | 12, 4.5%                     | 6, 2.2%          | 13, 4.8%         |          |
| HR (95% CI)                        | 1 (ref)                      | 0.47 (0.15-1.34) | 1.11 (0.43-2.90) | 0.232    |
| <b>Potatoes</b>                    |                              |                  |                  |          |
| Median (g/day)                     | 15.7                         | 43.8             | 86.7             |          |
| Number of each tertile             | 261                          | 271              | 267              |          |
| Death n, %                         | 9, 3.4%                      | 14, 5.1%         | 8, 3.0%          |          |
| HR (95% CI)                        | 1 (ref)                      | 1.29 (0.53-3.28) | 0.88 (0.31-2.49) | 0.711    |
| <b>Beans</b>                       |                              |                  |                  |          |
| Median (g/day)                     | 25.8                         | 61.7             | 117              |          |
| Number of each tertile             | 264                          | 264              | 271              |          |
| Death n, %                         | 11, 4.1%                     | 14, 5.3%         | 6, 2.2%          |          |
| HR (95% CI)                        | 1 (ref)                      | 1.67 (0.67-4.32) | 0.60 (0.19-1.73) | 0.142    |
| <b>Nuts and seeds</b>              |                              |                  |                  |          |
| Median (g/day)                     | 0.0                          | 1.3              | 7.3              |          |
| Number of each tertile             | 265                          | 256              | 278              |          |
| Death n, %                         | 14, 5.2%                     | 6, 2.3%          | 11, 3.9%         |          |
| HR (95% CI)                        | 1 (ref)                      | 0.48 (0.16-1.31) | 0.82 (0.33-2.03) | 0.387    |
| <b>Non-green yellow vegetables</b> |                              |                  |                  |          |
| Median (g/day)                     | 99.8                         | 172.7            | 259.1            |          |
| Number of each tertile             | 265                          | 267              | 267              |          |
| Death n, %                         | 7, 2.6%                      | 14, 5.2%         | 10, 3.7%         |          |
| HR (95% CI)                        | 1 (ref)                      | 2.45 (0.97-6.73) | 2.26 (0.77-6.96) | 0.167    |
| <b>Green yellow vegetables</b>     |                              |                  |                  |          |
| Median (g/day)                     | 57.0                         | 114.4            | 187.6            |          |
| Number of each tertile             | 265                          | 267              | 267              |          |
| Death n, %                         | 9, 3.4%                      | 12, 4.4%         | 10, 3.7%         |          |
| HR (95% CI)                        | 1 (ref)                      | 1.50 (0.60-3.94) | 1.44 (0.54-3.92) | 0.663    |
| <b>Fruits</b>                      |                              |                  |                  |          |
| Median (g/day)                     | 61.0                         | 148.5            | 276.7            |          |
| Number of each tertile             | 262                          | 270              | 267              |          |
| Death n, %                         | 14, 5.3%                     | 8, 2.9%          | 9, 3.3%          |          |
| HR (95% CI)                        | 1 (ref)                      | 0.63 (0.23-1.62) | 0.73 (0.27-1.85) | 0.617    |
| <b>Mushrooms</b>                   |                              |                  |                  |          |
| Median (g/day)                     | 0.0                          | 10               | 27.6             |          |
| Number of each tertile             | 259                          | 271              | 269              |          |
| Death n, %                         | 11, 4.2%                     | 14, 5.1%         | 6, 2.2%          |          |
| HR (95% CI)                        | 1 (ref)                      | 1.03 (0.43-2.52) | 0.54 (0.17-1.51) | 0.404    |
| <b>Seaweed</b>                     |                              |                  |                  |          |
| Median (g/day)                     | 3.4                          | 11.3             | 27.5             |          |
| Number of each tertile             | 265                          | 267              | 267              |          |
| Death n, %                         | 9, 3.4%                      | 10, 3.7%         | 12, 4.4%         |          |
| HR (95% CI)                        | 1 (ref)                      | 0.80 (0.29-2.20) | 1.35 (0.51-3.66) | 0.541    |
| <b>Fish and shellfish</b>          |                              |                  |                  |          |
| Median (g/day)                     | 54.1                         | 89.5             | 143.3            |          |
| Number of each tertile             | 265                          | 267              | 267              |          |
| Death n, %                         | 11, 4.1%                     | 9, 3.3%          | 11, 4.1%         |          |
| HR (95% CI)                        | 1 (ref)                      | 0.75 (0.27-2.01) | 1.21 (0.46-3.23) | 0.634    |
| <b>Meats</b>                       |                              |                  |                  |          |
| Median (g/day)                     | 21.7                         | 48.3             | 80               |          |
| Number of each tertile             | 265                          | 266              | 268              |          |
| Death n, %                         | 12, 4.5%                     | 11, 4.1%         | 8, 2.9%          |          |
| HR (95% CI)                        | 1 (ref)                      | 1.07 (0.42-2.73) | 1.02 (0.36-2.81) | 0.990    |
| <b>Eggs</b>                        |                              |                  |                  |          |
| Median (g/day)                     | 20.0                         | 45               | 68.8             |          |
| Number of each tertile             | 264                          | 267              | 268              |          |
| Death n, %                         | 11, 4.1%                     | 8, 3.0%          | 12, 4.4%         |          |
| HR (95% CI)                        | 1 (ref)                      | 0.83 (0.31-2.15) | 1.54 (0.64-3.74) | 0.402    |
| <b>Milk and dairy products</b>     |                              |                  |                  |          |
| Median (g/day)                     | 13.3                         | 155.7            | 285.3            |          |
| Number of each tertile             | 262                          | 270              | 267              |          |
| Death n, %                         | 15, 5.7%                     | 8, 2.9%          | 8, 3.0%          |          |
| HR (95% CI)                        | 1 (ref)                      | 0.48 (0.17-1.24) | 0.56 (0.20-1.49) | 0.283    |

HR—Hazard ratio, CI—Confidence Interval, ref—reference.

<sup>1</sup> HR adjusted for age, sex, body mass index, education, smoking status, alcohol intake, physical activity and history of hypertension, dyslipidemia, and diabetes mellitus. All food intakes were entered in a single model.
